# Supplementary material for: Differentially expressed microRNAs between cattleyak and yak testis
Source: PubMed Central journal article supplement (PMC5766512; doi:10.1038/s41598-017-18607-0), 2018-01-12
Supplement: 41598_2017_18607_MOESM1_ESM.pdf [file 41598_2017_18607_MOESM1_ESM.pdf]

# Differentially expressed microRNAs between cattleyak and yak testis

**Chuanfei Xu<sup>1</sup>, Shixin Wu<sup>1</sup>, Wangsheng Zhao<sup>1</sup>, TserangDonko Mipam<sup>2</sup>, Jingbo Liu<sup>1</sup>, Wenjing Liu<sup>1</sup>, Chuanping Yi<sup>1</sup>, Mujahid ali Shah<sup>1</sup>, Shumin Yu<sup>3</sup> & Xin Cai<sup>1</sup>**

<sup>1</sup>School of Life Science and Engineering, Southwest University of Science and Technology, Mianyang 621010, Sichuan, China. <sup>2</sup>College of Life Science and Technology, Southwest University for Nationalities, Chengdu 610041, Sichuan, China. <sup>3</sup>College of Veterinary Medicine, Sichuan Agricultural University, Chengdu 611130, Sichuan, China.

Correspondence and requests for materials should be addressed to X.C. (email: caixin2323@126.com)

| Sample | miRNA     | Precursor | Mt_tRNA | Mt_rRNA | rRNA      | misc_RNA | mRNA      | snoRNA  | snRNA   | linc_RNA | unannotated |
|--------|-----------|-----------|---------|---------|-----------|----------|-----------|---------|---------|----------|-------------|
| CY1    | 1,598,540 | 87,072    | 84,933  | 96,857  | 430,289   | 117,125  | 2,095,578 | 236,687 | 107,022 | 0        | 14,157,462  |
| CY2    | 2,802,887 | 140,948   | 92,537  | 154,890 | 780,308   | 146,864  | 2,029,634 | 341,671 | 113,487 | 0        | 15,567,627  |
| CY3    | 1,076,993 | 70,950    | 103,009 | 342,534 | 1,043,577 | 181,775  | 2,078,913 | 439,574 | 171,783 | 0        | 23,636,607  |
| YK1    | 3,975,469 | 143,865   | 278,957 | 418,914 | 1,327,922 | 433,379  | 4,356,065 | 740,771 | 273,545 | 0        | 37,310,411  |
| YK2    | 2,496,856 | 104,354   | 132,545 | 330,588 | 584,479   | 148,006  | 2,625,391 | 222,451 | 98,620  | 0        | 21,605,297  |
| YK3    | 2,040,259 | 92,021    | 72,883  | 80,794  | 538,848   | 122,537  | 3,129,987 | 197,924 | 101,599 | 0        | 28,880,074  |

**Table S1. Statistics for classified small RNA from cattleyak and yak testis miRNA-seq data.**

| MiRNA name        | Sample name      | Location                         | Sequence                | Length | Genome hits | Hairpin length | Hairpin % G/C content | Minimum free energy | Adjusted MFE | Randfold p-value |
|-------------------|------------------|----------------------------------|-------------------------|--------|-------------|----------------|-----------------------|---------------------|--------------|------------------|
| Bta-novel-miR-1   | YK1, YK3         | chr16:18872291-18872312:[-]      | AAAAAACCAGTGGACTTTTTG   | 22     | 1           | 110            | 44.54545              | -51.2               | -46.5455     | 0.009901         |
| Bta-novel-miR-2   | CY2              | chr23:24510595-24510617:[-]      | AAAATCTGTATGGCATGATAACT | 23     | 2           | 161            | 32.29814              | -40.79              | -25.3354     | 0.019802         |
| Bta-novel-miR-3   | CY1              | chr13:38147531-38147550:[-]      | AAATGCCCTGCAGTCTGCTG    | 20     | 1           | 66             | 54.54545              | -21.9               | -33.1818     | 0.049505         |
| Bta-novel-miR- 4  | CY1,2, YK1,2     | chr12:50716633-50716654:[+]      | AACGTAGAATATGCAGCAGGAC  | 22     | 2           | 52             | 40.38462              | -13.2               | -25.3846     | 0.039604         |
| Bta-novel-miR- 5  | CY1,2            | chr19:23217212-23217234:[-]      | AACTCTGTGTGGTCTGAGGCTC  | 23     | 1           | 94             | 52.12766              | -33.9               | -36.0638     | 0.049505         |
| Bta-novel-miR- 6  | CY2, YK1,2       | NW_001503906.2:21904-21925:[+]   | AACTGTTAGGAGGCTTGGCTGC  | 22     | 1           | 124            | 53.22581              | -52.79              | -42.5726     | 0.009901         |
| Bta-novel-miR- 7  | CY3              | chr8:11265865-11265886:[-]       | AAGGACCAGTGCAGAGAAGTGCC | 22     | 1           | 151            | 62.25166              | -67.6               | -44.7682     | 0.09901          |
| Bta-novel-miR- 8  | CY1              | chr11:317742-317763:[-]          | AATACTGAGTTGGCTAGAAAAGT | 22     | 1           | 79             | 43.03797              | -36                 | -45.5696     | 0.009901         |
| Bta-novel-miR- 9  | CY1,2            | chr4:101889395-101889417:[+]     | ACACCACCTGAACGCGCCCGAT  | 23     | 1           | 119            | 56.30252              | -48.8               | -41.0084     | 0.019802         |
| Bta-novel-miR- 10 | CY1              | chr6:72372959-72372976:[-]       | ACAGGATTGACAGATTGA      | 18     | 4           | 87             | 45.97701              | -28                 | -32.1839     | 0.049505         |
| Bta-novel-miR- 11 | CY1,2, YK1,2,3   | chrX:17249212-17249233:[]        | ACATAGTGCCTTTCTGGGTTGT  | 22     | 1           | 79             | 45.56962              | -31.9               | -40.3797     | 0.009901         |
| Bta-novel-miR- 12 | CY2, YK1,2       | chr14:13270477-13270499:[-]      | ACATGCAAAGGATCTCCCTGACT | 23     | 3           | 62             | 50                    | -24.6               | -39.6774     | 0.019802         |
| Bta-novel-miR- 13 | CY1,2,3, YK1,2,3 | chr8:102341314-102341336:[+]     | ACCTCCCGTGGAGCAGAAGGGCA | 23     | 10          | 158            | 51.26582              | -56.3               | -35.6329     | 0.069307         |
| Bta-novel-miR- 14 | YK3              | chr12:14453535-14453556:[-]      | ACGCATCTATTGACAGACCTG   | 22     | 2           | 136            | 42.64706              | -46.2               | -33.9706     | 0.009901         |
| Bta-novel-miR- 15 | YK2              | NW_001493008.1:277555-277576:[-] | ACGGGCGAGGGCATGGACGAGA  | 22     | 6           | 88             | 62.5                  | -36.7               | -41.7045     | 0.049505         |
| Bta-novel-miR- 16 | CY2              | chr21:65937137-65937159:[+]      | ACGTGTCAGGAGCTCTGAGGTCC | 23     | 1           | 73             | 47.94521              | -22.8               | -31.2329     | 0.069307         |
| Bta-novel-miR- 17 | YK3              | NW_001508850.2:265452-265474:[+] | ACTAAGTCAAGTAGAACCAAGAA | 23     | 2           | 84             | 47.61905              | -42.9               | -51.0714     | 0.009901         |
| Bta-novel-miR- 18 | CY2, YK1,2       | chr14:13104096-13104117:[-]      | ACTTCAGAGACTGGACTGTGCC  | 22     | 8           | 100            | 60                    | -41.1               | -41.1        | 0.089109         |
| Bta-novel-miR- 19 | CY2              | NT_186281.1:1869-1891:[+]        | ACTTTTGCCCTAGTAACGGACT  | 23     | 1           | 54             | 53.7037               | -23.22              | -43          | 0.009901         |
| Bta-novel-miR- 20 | CY2              | chr29:51173239-51173260:[+]      | AGACTCAGAGCCTCCAGAGCCC  | 22     | 1           | 114            | 58.77193              | -49.13              | -43.0965     | 0.009901         |
| Bta-novel-miR- 21 | CY1,2,3, YK1,2,3 | chr29:46149483-46149504:[-]      | AGGGACAAGTGGCGTTAGCCA   | 22     | 4           | 92             | 63.04348              | -39.3               | -42.7174     | 0.039604         |
| Bta-novel-miR- 22 | CY1,2, YK3       | chr8:37767631-37767649:[-]       | AGGGGCTCTCGTTCTGGC      | 19     | 5           | 96             | 78.125                | -54.7               | -56.9792     | 0.079208         |
| Bta-novel-miR- 23 | CY2              | chr10:77712450-77712468:[-]      | AGGTGTCAGAAAAGTTACC     | 19     | 6           | 132            | 40.90909              | -37.72              | -28.5758     | 0.079208         |
| Bta-novel-miR- 24 | CY2              | chr19:54656312-54656333:[+]      | AGTTTCTGGACATCGAGGACCC  | 22     | 1           | 93             | 56.98925              | -40.9               | -43.9785     | 0.019802         |
| Bta-novel-miR- 25 | YK1,2            | chr5:17677483-17677502:[+]       | ATACATAGGGCTTGTTTCC     | 20     | 3           | 153            | 39.21569              | -48                 | -31.3725     | 0.009901         |
| Bta-novel-miR- 26 | YK2,3            | chr8:103403919-103403941:[+]     | ATCATTCTTCACTCTGCTTCTCT | 23     | 1           | 99             | 49.49495              | -32.2               | -32.5253     | 0.039604         |
| Bta-novel-miR- 27 | CY1,2,3          | chr21:60626164-60626186:[-]      | ATCTGTAGTCTCGGCGTCGCACT | 23     | 1           | 59             | 57.62712              | -22.1               | -37.4576     | 0.079208         |

|                   |                    |                                |                         |    |    |     |             |         |                  |          |
|-------------------|--------------------|--------------------------------|-------------------------|----|----|-----|-------------|---------|------------------|----------|
| Bta-novel-miR- 28 | CY2,<br>YK1        | NW_001506628.1:8333-8355:[+]   | ATGTGGGCTAGTTTCGGACAAGG | 23 | 4  | 84  | 47.61905    | -29     | -34.5238         | 0.009901 |
| Bta-novel-miR- 29 | CY1,2,3<br>YK1,2,3 | NT_184731.1:59559-59579:[-]    | ATTGGCATTCTTAGAGTGGA    | 21 | 1  | 126 | 43.65079    | -55.6   | -44.127          | 0.009901 |
| Bta-novel-miR- 30 | CY1,<br>YK3        | NT_185358.1:947-967:[+]        | ATTGGCGCTCTTTGAGTGTG    | 21 | 1  | 274 | 44.89051    | -94.3   | -34.4161         | 0.009901 |
| Bta-novel-miR- 31 | YK1                | chr3:73232436-73232458L:[-]    | ATTTTAAAATGGCACTGAGACCT | 23 | 1  | 134 | 35.07463    | -36.3   | -27.0896         | 0.029703 |
| Bta-novel-miR- 32 | YK1                | chr1:82008274-82008296:[-]     | CACCAAAAGTTTGTATTGGGGG  | 23 | 1  | 91  | 39.56044    | -31.3   | -34.3956         | 0.009901 |
| Bta-novel-miR- 33 | CY1,2,3<br>YK1,2,3 | chr10:16545156-16545176:[+]    | CACCTAGCACTCGCTCGCAC    | 21 | 2  | 139 | 67.6259     | -65.6   | -47.1942         | 0.019802 |
| Bta-novel-miR- 34 | CY1                | chr14:13107101-13107119:[-]    | CACCTGTGACTCCTGCAAC     | 19 | 2  | 73  | 56.16438    | -25.82  | -35.3699         | 0.039604 |
| Bta-novel-miR- 35 | YK1                | chr12:67657872-67657893:[-]    | CATACATAGGGCTGTTTTCCA   | 22 | 3  | 175 | 41.14286    | -49.1   | -28.0571         | 0.079208 |
| Bta-novel-miR- 36 | CY1,2,3<br>YK1,2,3 | chr7:39694724-39694746:[-]     | CATGTCCTGCAATTCTGAAGGGA | 23 | 1  | 212 | 51.88679    | -80.5   | -37.9717         | 0.049505 |
| Bta-novel-miR- 37 | CY2                | chr3:23597313-23597332:[+]     | CCATTGATCGCCAGGGTTGA    | 20 | 12 | 78  | 58.97436    | -32.8   | -42.0513         | 0.029703 |
| Bta-novel-miR- 38 | CY2<br>YK1         | chr2:130337511-130337532:[-]   | CCCAACGTGGATACCCCGGAG   | 22 | 1  | 55  | 67.27273    | -26.2   | -47.6364         | 0.079208 |
| Bta-novel-miR- 39 | CY1,<br>YK1,2,3    | chr3:9025265-9025283:[-]       | CCCGCCCCCGCCTCCCC       | 19 | 6  | 97  | 75.25773    | -58.9   | -60.7216         | 0.019802 |
| Bta-novel-miR- 40 | CY1,<br>YK1,2,3    | chr3:120901931-120901948:[]    | CCCGCGAGGGGCGGGGC       | 18 | 5  | 99  | 73.73737    | -54.6   | -55.1515         | 0.089109 |
| Bta-novel-miR- 41 | YK3                | NT_186807.1:12259-12280:[+]    | CCCGCGCCCTGTCCCGCGCC    | 22 | 2  | 253 | 78.65613    | -161.81 | -63.9565         | 0.029703 |
| Bta-novel-miR- 42 | CY1,2<br>YK1       | chr8:96283004-96283021:[-]     | CCGGCGCGCGCGCGACT       | 18 | 3  | 91  | 65.93407    | -45.1   | -49.5604         | 0.009901 |
| Bta-novel-miR- 43 | CY1,<br>YK2        | NT_186807.1:11785-11806:[+]    | CGCGTGTGCGCGGTCGGCCC    | 22 | 3  | 114 | 81.57895    | -70.5   | -61.8421         | 0.09901  |
| Bta-novel-miR- 44 | CY2,<br>YK3        | chr3:8805035-8805056:[-]       | CGGCGCTCACCGCCGCGCC     | 22 | 7  | 111 | 72.97297    | -61     | -54.955          | 0.039604 |
| Bta-novel-miR- 45 | CY2                | NW_001503883.1:46673-46694:[-] | CGGGGACGCAACTCATCTCGCC  | 22 | 2  | 108 | 61.11111    | -42.1   | -38.9815         | 0.029703 |
| Bta-novel-miR- 46 | YK1,2              | chr8:62283764-62283786:[-]     | CGGGGCTCATTCTCAGCACGTCT | 23 | 1  | 96  | 60.41667    | -37.8   | -39.375          | 0.009901 |
| Bta-novel-miR- 47 | CY1,2<br>YK2,3     | chr10:103609388-103609405:[+]  | CGGGGCTGGGCGCGGCC       | 18 | 2  | 86  | 79.06977    | -54.5   | -63.3721         | 0.019802 |
| Bta-novel-miR- 48 | CY1                | NT_186807.1:12611-12632:[+]    | CGTCCCGGGCGTGGGTGGGAC   | 22 | 2  | 143 | 79.02098    | -87     | -60.8392         | 0.089109 |
| Bta-novel-miR- 49 | YK1                | chr10:89648986-89649007:[+]    | CTCATAATTTTGGAGGCTTTG   | 22 | 2  | 59  | 44.0678     | -19.2   | -32.5424         | 0.039604 |
| Bta-novel-miR- 50 | CY1<br>YK2,3       | chr14:13179610-13179628:[-]    | CTCCACCCTGTTGGGCAG      | 19 | 3  | 141 | 50.35461    | -64.39  | -45.6667         | 0.009901 |
| Bta-novel-miR- 51 | YK2                | chr8:7406580-7406598:[-]       | CTCCCGGGTTTCGGCACCA     | 19 | 6  | 136 | 66.91176    | -69     | -50.7353         | 0.029703 |
| Bta-novel-miR- 52 | CY1                | chr12:21236132-21236154:[+]    | CTCCTGCATCGAAAGTGATTGTG | 23 | 3  | 55  | 54.54545455 | -18.9   | -34.3636<br>3636 | 0.009901 |
| Bta-novel-miR- 53 | CY1                | chr13:67894471-67894493:[-]    | CTCTGGACTCAAGTTCTGAGCC  | 23 | 3  | 72  | 56.94444444 | -29.4   | -40.8333<br>3333 | 0.039604 |
| Bta-novel-miR- 54 | CY2                | chr7:51656870-51656891[-]      | CTGAAGACTGGAGTGCTCAGCC  | 22 | 1  | 104 | 57.69230769 | -45.6   | -43.8461<br>5385 | 0.049505 |

|                   |                |                             |                         |    |    |     |             |        |                  |          |
|-------------------|----------------|-----------------------------|-------------------------|----|----|-----|-------------|--------|------------------|----------|
| Bta-novel-miR- 55 | YK2            | chr19:40379828-40379850[-]  | CTGCAGATCAAGAGGTCCCGGT  | 23 | 10 | 84  | 52.38095238 | -27    | -32.1428<br>5714 | 0.029703 |
| Bta-novel-miR- 56 | YK1            | chr15:54113191-54113212[]   | CTTCAGTGATGACACGATGACG  | 22 | 1  | 61  | 50.81967213 | -22.7  | -37.2131<br>1475 | 0.009901 |
| Bta-novel-miR- 57 | YK1            | chr5:25967046-25967068[+]   | CTTGCAAAGTCTGAATTTGCC   | 22 | 1  | 61  | 50.81967213 | -22.7  | -37.2131<br>1475 | 0.009901 |
| Bta-novel-miR- 58 | CY3,<br>YK3    | chr17:5453362-5453379[+]    | CTTTTCTTTGTGAAGGGC      | 18 | 7  | 79  | 36.70886076 | -20.5  | -25.9493<br>6709 | 0.089109 |
| Bta-novel-miR- 59 | CY1            | chr19:56436571-56436592[-]  | AAAACAATCTGTTCTGAGGCT   | 22 | 1  | 105 | 52.38095238 | -36.8  | -35.0476<br>1905 | 0.019802 |
| Bta-novel-miR- 60 | YK1            | chr20:67344124-67344146[-]  | GAAATGATGAATTCTGGGCGC   | 23 | 1  | 163 | 38.65030675 | -44.1  | -27.0552<br>1472 | 0.059406 |
| Bta-novel-miR- 61 | CY1,2<br>YK2,3 | chr19:8789290-8789309[-]    | GAGAACGTAATCTGAGTGGT    | 20 | 2  | 124 | 42.74193548 | -41.9  | -33.7903<br>2258 | 0.009901 |
| Bta-novel-miR- 62 | CY1,2          | chr19:17961259-17961279[+]  | GAGCACTGTTCTGACCTGCT    | 21 | 1  | 149 | 56.37583893 | -60.6  | -40.6711<br>4094 | 0.079208 |
| Bta-novel-miR- 63 | CY2            | chr2:124743810-124743827[-] | GATAGTCAAGTCTGATC       | 18 | 1  | 126 | 38.0952381  | -39.5  | -31.3492<br>0635 | 0.009901 |
| Bta-novel-miR- 64 | CY3            | chr29:42383956-42383976[-]  | GATATTGACATCTCGGACCC    | 21 | 7  | 160 | 52.5        | -60.8  | -38              | 0.019802 |
| Bta-novel-miR- 65 | CY1            | NW_001497819.1_608-627[+]   | GATATTGACATCTCGGACC     | 20 | 7  | 186 | 53.22580645 | -69.5  | -37.3655<br>914  | 0.019802 |
| Bta-novel-miR- 66 | YK2,3          | chr13:52907883-52907904[-]  | GATGTCTCCATGTCTCTGAGCA  | 22 | 1  | 92  | 46.73913043 | -25.5  | -27.7173<br>913  | 0.089109 |
| Bta-novel-miR- 67 | YK2            | chr3:24239329-24239348[-]   | GCACTCTGGACTTTGAATCC    | 20 | 14 | 71  | 53.52112676 | -24.4  | -34.3661<br>9718 | 0.079208 |
| Bta-novel-miR- 68 | CY2            | chr7:17175965-17175986[-]   | GCAGCCAAGAAGGACTGAGCCC  | 22 | 4  | 87  | 57.47126437 | -35.7  | -41.0344<br>8276 | 0.009901 |
| Bta-novel-miR- 69 | CY2,3<br>YK1,2 | chr2:72367568-72367585[+]   | GCATGGGTGGTTCAGTGG      | 18 | 14 | 112 | 48.21428571 | -35.6  | -31.7857<br>1429 | 0.039604 |
| Bta-novel-miR- 70 | CY1            | NW_001506399.2_8831-8853[-] | GCCCTGACCTTCGGTCTCCTGTC | 23 | 4  | 94  | 71.27659574 | -50.5  | -53.7234<br>0426 | 0.059406 |
| Bta-novel-miR- 71 | CY1<br>YK1,3   | chr2:101406972-101406993[+] | GCGTTGGTGGTATAGTGGTGAG  | 22 | 11 | 51  | 49.01960784 | -17.3  | -33.9215<br>6863 | 0.019802 |
| Bta-novel-miR- 72 | CY2            | chr6:93932574-93932596[+]   | GCTGAGAATTGTGGAGCCATACA | 23 | 11 | 53  | 43.39622642 | -18.3  | -34.5283<br>0189 | 0.009901 |
| Bta-novel-miR- 73 | YK1            | chr19:26645281-26645302[+]  | GCTGCAGGATGAGAAATTACC   | 22 | 2  | 137 | 50.3649635  | -39.62 | -28.9197<br>0803 | 0.059406 |
| Bta-novel-miR- 74 | CY2            | chr4:89153590-89153608[-]   | GGAAACTCTGGTGGAGGTC     | 19 | 4  | 152 | 45.39473684 | -50.3  | -33.0921<br>0526 | 0.019802 |
| Bta-novel-miR- 75 | YK3            | chr21:52035490-52035510[-]  | GGCCGTGTGCCGCTCGTTGCC   | 21 | 3  | 61  | 83.60655738 | -49.1  | -80.4918<br>0328 | 0.009901 |
| Bta-novel-miR- 76 | CY1            | chr6:78036670-78036687[+]   | GGCTGGTCCGATGGTAGT      | 18 | 2  | 94  | 43.61702128 | -32.61 | -34.6914<br>8936 | 0.009901 |

|                   |              |                               |                         |    |    |     |             |        |                  |          |
|-------------------|--------------|-------------------------------|-------------------------|----|----|-----|-------------|--------|------------------|----------|
| Bta-novel-miR- 77 | CY3          | chr3:17413311-17413332[-]     | GGGCATACTTGTAGACCTTGCC  | 22 | 1  | 59  | 57.62711864 | -30.3  | -51.3559<br>322  | 0.019802 |
| Bta-novel-miR- 78 | CY2<br>YK1,2 | NT_183129.1_192-213[-]        | GGGCCGTGTGCCGCTCGTTGCC  | 22 | 3  | 55  | 81.81818182 | -40    | -72.7272<br>7273 | 0.009901 |
| Bta-novel-miR- 79 | YK1          | chr4:91654916-91654933[-]     | GGGCGCGCGCCGCGGCTG      | 18 | 2  | 141 | 77.30496454 | -81    | -57.4468<br>0851 | 0.079208 |
| Bta-novel-miR- 80 | CY1          | chr23:30072999-30073018[+]    | GGGGGTGTAGCTCAGTGGTA    | 20 | 16 | 138 | 52.89855072 | -54.1  | -39.2028<br>9855 | 0.009901 |
| Bta-novel-miR- 81 | YK2          | chr23:29130547-29130567[+]    | GGGGGTGTAGCTCAGTGGTAG   | 21 | 15 | 132 | 56.06060606 | -50.8  | -38.4848<br>4848 | 0.089109 |
| Bta-novel-miR- 82 | YK1          | chr19:28098913-28098934[-]    | GGGTAGTTGAGTGTAGTATATT  | 22 | 1  | 141 | 50.35460993 | -49.2  | -34.8936<br>1702 | 0.089109 |
| Bta-novel-miR- 83 | CY1          | chr12:41034461-41034478[-]    | GGTGGCGGGGGAGGTCT       | 18 | 3  | 90  | 50          | -34.12 | -37.9111<br>1111 | 0.009901 |
| Bta-novel-miR- 84 | CY1,3        | chr24:23779081-23779102[+]    | GTCACCCATTGATGCCAGGG    | 22 | 13 | 53  | 58.49056604 | -18.6  | -35.0943<br>3962 | 0.039604 |
| Bta-novel-miR- 85 | CY1          | chr18:24839516-24839535[+]    | GTCAGGATGGCCGAGCGGTC    | 20 | 6  | 132 | 57.57575758 | -49.42 | -37.4393<br>9394 | 0.019802 |
| Bta-novel-miR- 86 | CY1          | chr15:42769991-42770012[-]    | GTCGAGGCTAGAGTCACGCTTG  | 22 | 1  | 84  | 51.19047619 | -33.7  | -40.1190<br>4762 | 0.009901 |
| Bta-novel-miR- 87 | YK2          | NW_001502870.1_32207-32229[-] | GTGTAGACTTTGGATCGCAGCC  | 23 | 11 | 152 | 46.71052632 | -44.14 | -29.0394<br>7368 | 0.019802 |
| Bta-novel-miR- 88 | CY1          | chr7:33295607-33295624[-]     | GTTTAGTGGCAGAGCCC       | 18 | 1  | 86  | 50          | -30.7  | -35.6976<br>7442 | 0.019802 |
| Bta-novel-miR- 89 | YK1          | chr6:101595666-101595686[+]   | TAAGGGACCTTGATACAACCT   | 21 | 1  | 96  | 52.08333333 | -31.31 | -32.6145<br>8333 | 0.049505 |
| Bta-novel-miR- 90 | YK2          | chr23:8347899-8347921[-]      | TAATCCAGATATCTTGATCCACC | 23 | 1  | 50  | 50          | -16.5  | -33              | 0.039604 |
| Bta-novel-miR- 91 | YK3          | chr28:32838063-32838084[+]    | TACATTCTGGCCAAATGCATC   | 22 | 1  | 67  | 37.31343284 | -16.8  | -25.0746<br>2687 | 0.09901  |
| Bta-novel-miR- 92 | YK2,3        | chr7:13844661-13844683[+]     | TACCAGTTCTACCTGGCTAGGAT | 23 | 1  | 50  | 60          | -18.8  | -37.6            | 0.039604 |
| Bta-novel-miR- 93 | YK3          | chr10:47899820-47899840[-]    | TACTGGGCAGAACTGATTC     | 21 | 1  | 88  | 50          | -28.4  | -32.2727<br>2727 | 0.019802 |
| Bta-novel-miR- 94 | YK1          | ChrX:17248143-17248163[+]     | TACTGTGCCCTGGATGGGTAG   | 21 | 1  | 82  | 54.87804878 | -36.6  | -44.6341<br>4634 | 0.009901 |
| Bta-novel-miR- 95 | CY1          | ChrX:17253954-17253974[+]     | TACTGTGCCCTGTATGGGTAG   | 21 | 1  | 111 | 53.15315315 | -49    | -44.1441<br>4414 | 0.009901 |
| Bta-novel-miR- 96 | CY1          | ChrX:17221885-17221902[+]     | TACTGTGCCTGAATGGG       | 18 | 4  | 82  | 51.2195122  | -37.5  | -45.7317<br>0732 | 0.009901 |
| Bta-novel-miR- 97 | CY1          | ChrX:17224842-17224860[+]     | TACTGTGCCTGAATGGGT      | 19 | 4  | 73  | 52.05479452 | -31.6  | -43.2876<br>7123 | 0.009901 |
| Bta-novel-miR- 98 | YK2          | chr21:29889678-29889700[+]    | TACTTGAAGAAGCTATTTAAA   | 23 | 2  | 109 | 48.62385321 | -35.2  | -32.2935<br>7798 | 0.079208 |
| Bta-novel-miR- 99 | YK3          | chr10:102366159-102366181[-]  | TAGCCTGTGAACCTTGTGGTTTC | 23 | 2  | 143 | 38.46153846 | -39.8  | -27.8321         | 0.039604 |

|                    |                |                               |                         |    |    |     |             |        |                  |          |
|--------------------|----------------|-------------------------------|-------------------------|----|----|-----|-------------|--------|------------------|----------|
|                    |                |                               |                         |    |    |     |             |        | 6783             |          |
| Bta-novel-miR- 100 | YK3            | chr8:18009183-18009205[+]     | TAGGATGCAAAATCACTGCTGCT | 23 | 1  | 50  | 48          | -15.3  | -30.6            | 0.039604 |
| Bta-novel-miR- 101 | YK2            | chr24:43778631-43778653       | TAGTTAGGGCAGTGTGAGTCAGG | 23 | 1  | 53  | 47.16981132 | -13.5  | -25.4716<br>9811 | 0.089109 |
| Bta-novel-miR- 102 | YK3            | chr8:18011864-18011886[+]     | TATAGATAGAGCGTCCAGCAGCT | 23 | 1  | 154 | 55.19480519 | -63.2  | -41.0389<br>6104 | 0.089109 |
| Bta-novel-miR- 103 | YK3            | chr8:18023359-18023379[+]     | TATTCAGACTGGGTCAAGCC    | 21 | 1  | 119 | 57.98319328 | -49.3  | -41.4285<br>7143 | 0.059406 |
| Bta-novel-miR- 104 | YK2,3          | chr21:9058366-9058388[+]      | TCAAAGGTTCTGTCTTCTGGCT  | 23 | 1  | 100 | 49          | -35.4  | -35.4            | 0.019802 |
| Bta-novel-miR- 105 | YK3            | chr24:43826159-43826179[-]    | TCAAGATTGAGTTCTGAGCC    | 21 | 1  | 73  | 52.05479452 | -29.4  | -40.2739<br>726  | 0.019802 |
| Bta-novel-miR- 106 | YK3            | chr3:15252738-15252755[+]     | TCAAGTAGAACCAAGAAA      | 18 | 5  | 70  | 48.57142857 | -37.6  | -53.7142<br>8571 | 0.009901 |
| Bta-novel-miR- 107 | CY1,2<br>YK1,2 | NT_186680.1_401-422[+]        | TCAAGTCCCTGTTGGGCGCCA   | 22 | 16 | 104 | 51.92307692 | -38    | -36.5384<br>6154 | 0.039604 |
| Bta-novel-miR- 108 | CY1,2<br>YK1   | chr7:11067820-11067842[+]     | TCAAGTGATGGAGATGACAACCT | 23 | 1  | 101 | 59.40594059 | -34.3  | -33.9603<br>9604 | 0.009901 |
| Bta-novel-miR- 109 | YK2            | chr7:99031284-99031305[+]     | TCAGAACTCTGCAGCATGACCC  | 22 | 9  | 142 | 47.88732394 | -49.1  | -34.5774<br>6479 | 0.079208 |
| Bta-novel-miR- 110 | YK3            | chr12:29284074-29284094[+]    | TCATTTGTGGAACCTGGCGC    | 21 | 1  | 81  | 49.38271605 | -26.3  | -32.4691<br>358  | 0.09901  |
| Bta-novel-miR-111  | YK3            | chr10:59259806-59259824[-]    | TCGCATTTGAGCTGGACCT     | 19 | 1  | 60  | 55          | -22.5  | -37.5            | 0.019802 |
| Bta-novel-miR- 112 | CY1,2,3<br>YK2 | chr29:43141286-43141306[+]    | TCGCTTTTGTATCCTTCGATG   | 21 | 5  | 102 | 40.19607843 | -33.5  | -32.8431<br>3725 | 0.009901 |
| Bta-novel-miR- 113 | CY2            | NW_001503085.2_25882-25903[-] | TCTGCAGAAGCCTTACATAA    | 22 | 1  | 57  | 47.36842105 | -21.1  | -37.0175<br>4386 | 0.049505 |
| Bta-novel-miR- 114 | YK3            | NW_001505770.1_2174-2196[+]   | TCTGTAGTCTGAATAGATATCA  | 23 | 2  | 62  | 40.32258065 | -17.1  | -27.5806<br>4516 | 0.059406 |
| Bta-novel-miR- 115 | YK3            | NT_185358.1_6106-6124[+]      | TCTGTCACCTTCTTGAGTG     | 19 | 1  | 166 | 46.98795181 | -76.3  | -45.9638<br>5542 | 0.009901 |
| Bta-novel-miR- 116 | YK3            | chr19:56252028-56252050[-]    | TCTGTCTGTAGTGAGGACCT    | 23 | 9  | 113 | 38.9380531  | -35.87 | -31.7433<br>6283 | 0.019802 |
| Bta-novel-miR- 117 | CY2            | chr5:10822635-10822656[+]     | TCTTAAAGGCACGAGAGGACAG  | 22 | 1  | 71  | 53.52112676 | -31.5  | -44.3661<br>9718 | 0.019802 |
| Bta-novel-miR- 118 | CY3            | chr10:58883419-58883440[+]    | TCTTAAAGATTTGGTGCAATATG | 22 | 3  | 87  | 42.52873563 | -27.8  | -31.9540<br>2299 | 0.009901 |
| Bta-novel-miR- 119 | YK2,3          | chr18:38632177-38632199[+]    | TCTTAGAATTCCTACTTGAAGA  | 23 | 1  | 110 | 61.81818182 | -45.29 | -41.1727<br>2727 | 0.019802 |
| Bta-novel-miR- 120 | YK1            | chr23:30042338-30042360[-]    | TCTTTACAGGCCTCGTGAACCC  | 23 | 2  | 98  | 43.87755102 | -27.8  | -28.3673<br>4694 | 0.009901 |
| Bta-novel-miR- 121 | YK3            | chr9:34664277-34664297[+]     | TCTTTGAGACTCCACGGACTG   | 21 | 14 | 103 | 51.45631068 | -38.4  | -37.2815<br>534  | 0.029703 |
| Bta-novel-miR- 122 | CY2            | chr29:662873-662895[+]        | TGAACTAAAACCTAATTCTGATA | 23 | 3  | 119 | 34.45378151 | -31    | -26.0504         | 0.019802 |

|                    |              |                               |                         |    |    |     |             |        |                  |          |
|--------------------|--------------|-------------------------------|-------------------------|----|----|-----|-------------|--------|------------------|----------|
|                    | YK1,2        |                               |                         |    |    |     |             |        | 2017             |          |
| Bta-novel-miR- 123 | YK3          | chr17:19180002-19180024[+]    | TGAAGAACTGAGGCACAAAGAG  | 23 | 9  | 61  | 34.42622951 | -19    | -31.1475<br>4098 | 0.009901 |
| Bta-novel-miR- 124 | CY1<br>YK1,2 | NW_001508724.2_22332-22352[-] | TGAGCACACCTGCCTGAGCAG   | 21 | 1  | 278 | 48.56115108 | -98.8  | -35.5395<br>6835 | 0.009901 |
| Bta-novel-miR- 125 | YK3          | chr8:12932677-12932696[+]     | TGAGGATATCAGAGAACTG     | 20 | 1  | 75  | 45.33333333 | -21.9  | -29.2            | 0.09901  |
| Bta-novel-miR- 126 | CY1<br>YK1   | chr29:662550-662571[+]        | TGAGGTCTATCCCGATGGGGCT  | 22 | 1  | 56  | 46.42857143 | -18.2  | -32.5            | 0.029703 |
| Bta-novel-miR- 127 | CY2<br>YK1   | chr1:84407381-84407403[-]     | TGATGGAAGTGGATCTGAGGA   | 23 | 1  | 126 | 56.34920635 | -49.3  | -39.1269<br>8413 | 0.09901  |
| Bta-novel-miR- 128 | CY2,3<br>YK2 | NT_184731.1_63275-63297[-]    | TGATTGGTACTTCTTAGAGTGGA | 23 | 1  | 130 | 47.69230769 | -63.17 | -48.5923<br>0769 | 0.009901 |
| Bta-novel-miR- 129 | CY1<br>YK2,3 | NW_001505770.1_358-377[+]     | TGATTGGTCTTTGAATGAC     | 20 | 9  | 166 | 41.56626506 | -54    | -32.5301<br>2048 | 0.009901 |
| Bta-novel-miR- 130 | YK3          | NW_001502712.2_78872-78894[+] | TGCAACTGAAGATCTGCATGCC  | 23 | 12 | 71  | 49.29577465 | -26.1  | -36.7605<br>6338 | 0.009901 |
| Bta-novel-miR- 131 | YK3          | chr24:43821835-43821856[-]    | TGCACATCCAGAGGGCTGTGTA  | 22 | 1  | 155 | 65.16129032 | -88.1  | -56.8387<br>0968 | 0.009901 |
| Bta-novel-miR- 132 | YK3          | chr5:108928753-108928775[+]   | TGCAGGTGGATTCTGTACCAACT | 23 | 15 | 51  | 52.94117647 | -15.8  | -30.9803<br>9216 | 0.09901  |
| Bta-novel-miR- 133 | CY2<br>YK1,2 | chr4:18492683-18492704[-]     | TGCCAGGTGGGGAGTTGACTG   | 22 | 8  | 67  | 58.20895522 | -27    | -40.2985<br>0746 | 0.009901 |
| Bta-novel-miR- 134 | YK2          | chr23:8333587-8333609[-]      | TGCCCTGGGTGATGTAAGAGCT  | 23 | 1  | 153 | 48.36601307 | -51.16 | -33.4379<br>085  | 0.019802 |
| Bta-novel-miR- 135 | YK3          | chr10:59243811-59243833[-]    | TGCCTGTGGACAGATGTATACCC | 23 | 1  | 180 | 47.22222222 | -60.8  | -33.7777<br>7778 | 0.009901 |
| Bta-novel-miR- 136 | YK2          | chr12:29260374-29260396[+]    | TGCCTTGACGTTCTGTGTTC    | 23 | 1  | 107 | 54.20560748 | -44.6  | -41.6822<br>4299 | 0.029703 |
| Bta-novel-miR- 137 | YK3          | chr23:8322655-8322676[-]      | TGCCTTTTGCAGAGCCTGAGC   | 22 | 1  | 65  | 53.84615385 | -27.8  | -42.7692<br>3077 | 0.039604 |
| Bta-novel-miR- 138 | CY1          | chr23:30930402-30930424[+]    | TGCGAAGAATAGGAAGCTGGCCT | 23 | 1  | 71  | 46.47887324 | -21.44 | -30.1971<br>831  | 0.069307 |
| Bta-novel-miR- 139 | YK3          | chr21:13755899-13755917[-]    | TGCTAAGTGACTAGACACC     | 19 | 1  | 153 | 41.83006536 | -42    | -27.4509<br>8039 | 0.039604 |
| Bta-novel-miR- 140 | YK3          | chr15:75962626-75962648[-]    | TGCTAGAGAAATCGGAGAGAATC | 23 | 1  | 115 | 40          | -32.81 | -28.5304<br>3478 | 0.029703 |
| Bta-novel-miR- 141 | CY1          | ChrX:84354759-84354780[+]     | TGCTCCTGCTTGAACATAGTCT  | 22 | 1  | 75  | 46.66666667 | -35.9  | -47.8666<br>6667 | 0.009901 |
| Bta-novel-miR- 142 | CY1,2        | chr20:61846085-61846102[-]    | TGGGAATGATGATTCTC       | 18 | 2  | 78  | 33.33333333 | -22.3  | -28.5897<br>4359 | 0.029703 |
| Bta-novel-miR- 143 | YK3          | chr10:59243054-59243075[-]    | TGGGAGTTGCAGGCCACTATAC  | 22 | 1  | 138 | 45.65217391 | -48.6  | -35.2173<br>913  | 0.029703 |
| Bta-novel-miR- 144 | YK3          | chr17:68154352-68154371[-]    | TGGGCCTGAAGTCTGTTTTG    | 20 | 1  | 141 | 43.97163121 | -44.4  | -31.4893         | 0.029703 |



|                    |                  |                               |                         |    |    |     |             |        |                  |          |
|--------------------|------------------|-------------------------------|-------------------------|----|----|-----|-------------|--------|------------------|----------|
|                    |                  |                               |                         |    |    |     |             |        | 617              |          |
| Bta-novel-miR- 145 | YK2              | NW_001503331.1_59376-59397[+] | TGGTGACTGTCTCGCCGTGCC   | 22 | 6  | 74  | 67.56756757 | -41.3  | -55.8108<br>1081 | 0.009901 |
| Bta-novel-miR- 146 | CY2,3<br>YK1     | NW_001502565.1_23006-23024[-] | TGTCCCTGTTGGGGCGCCA     | 19 | 9  | 81  | 67.90123457 | -38.2  | -47.1604<br>9383 | 0.049505 |
| Bta-novel-miR- 147 | YK3              | chr28:32833691-32833713[+]    | TGTCTGCAGACTGGCCACCCTGA | 23 | 1  | 159 | 57.86163522 | -68.4  | -43.0188<br>6792 | 0.039604 |
| Bta-novel-miR- 148 | YK2,3            | NW_001502911.2_20709-20729[+] | TGTGATGAGATATCAAGAACC   | 21 | 8  | 146 | 50          | -57.64 | -39.4794<br>5205 | 0.009901 |
| Bta-novel-miR- 149 | YK3              | chr19:56279222-56279243[+]    | TGTGGACTTTCCAGTTCCGGCC  | 22 | 1  | 183 | 58.46994536 | -82.1  | -44.8633<br>8798 | 0.019802 |
| Bta-novel-miR- 150 | YK3              | chr16:29541773-29541794[-]    | TGTGGCCTCTGGGTGTGTACCC  | 22 | 1  | 140 | 49.28571429 | -55.3  | -39.5            | 0.019802 |
| Bta-novel-miR- 151 | YK3              | chr28:32822141-32822160[+]    | TGTTACTGATTAGGAAATA     | 20 | 1  | 99  | 36.36363636 | -28.6  | -28.8888<br>8889 | 0.009901 |
| Bta-novel-miR- 152 | YK2              | NW_001503327.2_21068-21089[+] | TTAGTATCTTGGATGGGAGACC  | 22 | 14 | 59  | 50.84745763 | -23    | -38.9830<br>5085 | 0.029703 |
| Bta-novel-miR- 153 | YK3              | chr16:3016477-3016498[+]      | TTATGTCCGACTCTTGCAACCC  | 22 | 6  | 85  | 37.64705882 | -21.4  | -25.1764<br>7059 | 0.069307 |
| Bta-novel-miR- 154 | CY1,2<br>YK1,2,3 | NT_184731.1_45171-45191[-]    | TTCATAGGAAGGTGCATTCA    | 21 | 1  | 126 | 43.65079365 | -55.6  | -44.1269<br>8413 | 0.009901 |
| Bta-novel-miR- 155 | YK3              | chr5:81025290-81025311[-]     | TTCCAGGACTTTCTTCAACCT   | 22 | 1  | 193 | 47.15025907 | -67.1  | -34.7668<br>3938 | 0.079208 |
| Bta-novel-miR- 156 | YK3              | chr1:78325647-78325669[+]     | TTCCAGTTGAGCTGTTCAAACC  | 23 | 13 | 97  | 45.36082474 | -32    | -32.9896<br>9072 | 0.009901 |
| Bta-novel-miR- 157 | YK1,2            | chr3:32871458-32871475[-]     | TTCCCGGCCCATGCACCA      | 18 | 13 | 81  | 46.91358025 | -30.6  | -37.7777<br>7778 | 0.009901 |
| Bta-novel-miR- 158 | CY2<br>YK2       | chr13:54407150-54407171[-]    | TTCTCAGTTGGACAGTCTGA    | 22 | 1  | 146 | 63.01369863 | -65.71 | -45.0068<br>4932 | 0.059406 |
| Bta-novel-miR- 159 | YK3              | chr8:18014879-18014901[+]     | TTCTCATGACTGTGGGATTCCCC | 23 | 1  | 81  | 46.91358025 | -26.5  | -32.7160<br>4938 | 0.029703 |
| Bta-novel-miR- 160 | CY2,3            | chr3:107182820-107182841[+]   | TTCTCTCAGATCGTATAAATC   | 22 | 5  | 60  | 38.33333333 | -16    | -26.6666<br>6667 | 0.039604 |
| Bta-novel-miR- 161 | YK3              | chr23:8331616-8331638[-]      | TTCTGGTCTCTGGAAGCTTGGA  | 23 | 1  | 130 | 60.76923077 | -62.8  | -48.3076<br>9231 | 0.019802 |
| Bta-novel-miR- 162 | YK3              | chr12:29274750-29274772[+]    | TTCTTCTGTTGTTGCGATCAC   | 23 | 1  | 68  | 48.52941176 | -25.2  | -37.0588<br>2353 | 0.019802 |
| Bta-novel-miR- 163 | CY1              | NW_001502372.2_16452-16470[-] | TTGGCATGTCTTGAATGA      | 19 | 1  | 122 | 47.54098361 | -50.2  | -41.1475<br>4098 | 0.009901 |
| Bta-novel-miR- 164 | YK2,3            | chr23:8350407-8350428[+]      | TTGTAGATAACTTGGATGTGCC  | 22 | 1  | 107 | 47.6635514  | -52.2  | -48.7850<br>4673 | 0.009901 |
| Bta-novel-miR- 165 | YK3              | ChrX:57562783-57562805[-]     | TTGTGCTGACTCTGCGACCC    | 23 | 11 | 79  | 48.10126582 | -23.8  | -30.1265<br>8228 | 0.019802 |

|                    |            |                             |                         |    |    |     |             |        |                  |          |
|--------------------|------------|-----------------------------|-------------------------|----|----|-----|-------------|--------|------------------|----------|
| Bta-novel-miR- 166 | YK1        | chr9:100277893-100277915[-] | TTTCCCATTTGACTACCACATTA | 23 | 1  | 88  | 42.04545455 | -23    | -26.1363<br>6364 | 0.049505 |
| Bta-novel-miR- 167 | CY2<br>YK2 | chr11:40070993-40071011[+]  | TTCCCGGCCCATGCACCA      | 19 | 12 | 88  | 50          | -33.5  | -38.0681<br>8182 | 0.009901 |
| Bta-novel-miR- 168 | YK1        | chr17:68324312-68324333[+]  | TTGCCCGGATTTTCTGTAAC    | 22 | 1  | 195 | 36.41025641 | -62.37 | -31.9846<br>1538 | 0.009901 |

**Table S2. Statistics for novel miRNAs identified from testis of cattleyak and yak.**

| <b>MiRNA</b>    | <b>Total score</b> | <b>Total energy</b> | <b>Gene symbol</b>      | <b>Gene description</b>                                    |
|-----------------|--------------------|---------------------|-------------------------|------------------------------------------------------------|
| bta-miR-126-3p  | 174                | -24.64              | ZBTB20                  | zinc finger and BTB domain containing 20                   |
| bta-miR-130b    | 179                | -31.3               | TMEM194A                | Bos taurus transmembrane protein 194A                      |
|                 | 179                | -26.11              | ERAP1                   | endoplasmic reticulum aminopeptidase 1                     |
|                 | 321                | -47.22              | DLG5                    | Bos taurus discs, large homolog 5 (Drosophila)             |
| bta-miR-135a    | 175                | -20.59              | THRSP                   | Bos taurus thyroid hormone responsive                      |
|                 | 176                | -22.47              | ANKRD17                 | ankyrin repeat domain 17                                   |
|                 | 177                | -21.47              | TMC2                    | Bos taurus transmembrane channel-like 2                    |
|                 | 178                | -23.59              | PALM3                   | paralemmin 3                                               |
|                 | 180                | -25.04              | CUBN                    | Bos taurus cubilin (intrinsic factor-cobalamin receptor)   |
|                 | 182                | -22.55              | CSPP1                   | centrosome and spindle pole associated protein 1           |
|                 | 185                | -21.19              | RABGAP1L                | Bos taurus RAB GTPase activating protein 1-like            |
|                 | 304                | -42.05              | ZNF2                    | Bos taurus zinc finger protein 2                           |
|                 | 312                | -47.58              | ZNF596                  | Bos taurus zinc finger protein 596                         |
|                 | 314                | -43.26              | ZNF154                  | zinc finger protein 154                                    |
|                 | 322                | -46.3               | ZNF76                   | zinc finger protein 76                                     |
|                 | 323                | -49.58              | ZNF169                  | zinc finger protein 169                                    |
|                 | 326                | -44.44              | ZNF226                  | Bos taurus zinc finger protein 226                         |
|                 | 332                | -45.71              | ZNF167                  | Bos taurus zinc finger protein 167                         |
|                 | 335                | -43.08              | MTF1                    | Bos taurus metal-regulatory transcription factor 1         |
|                 | 337                | -44.8               | ZBTB24                  | zinc finger and BTB domain containing 24                   |
|                 | 337                | -45.9               | MYNN                    | Bos taurus myoneurin                                       |
| 800             | -110               | ZNF845              | zinc finger protein 845 |                                                            |
| bta-miR-19b     | 177                | -21.12              | SPEF2                   | sperm flagellar 2                                          |
|                 | 181                | -22.07              | CCNT2                   | cyclin T2                                                  |
| bta-miR-2318    | 186                | -21.6               | RABEP1                  | rabaptin, RAB GTPase binding effector protein 1            |
|                 | 315                | -45.18              | ZNF133                  | Bos taurus zinc finger protein 133                         |
| bta-miR-2332    | 175                | -23.64              | STOM                    | stomatin                                                   |
|                 | 175                | -20.26              | HAUS5                   | HAUS augmin-like complex, subunit 5                        |
|                 | 177                | -25.03              | IFI35-201               | Bos taurus interferon-induced protein 35 (IFI35)           |
|                 | 179                | -24.44              | IL6ST                   | interleukin 6 signal transducer                            |
|                 | 179                | -26.79              | CDK2                    | Bos taurus cyclin-dependent kinase 2                       |
|                 | 186                | -25.4               | RP2                     | Bos taurus retinitis pigmentosa 2 (X-linked recessive)     |
| bta-miR-2419-5p | 174                | -24.94              | PRKCD                   | protein kinase C, delta                                    |
|                 | 317                | -50.07              | FLYWCH1                 | FLYWCH-type zinc finger 1                                  |
| bta-miR-2435    | 174                | -31.81              | AGAP3                   | ArfGAP with GTPase domain, ankyrin repeat and PH domain 3  |
| bta-miR-2483-5p | 176                | -22.68              | ME2                     | Bos taurus malic enzyme 2, NAD(+)-dependent, mitochondrial |
|                 | 179                | -28.69              | ENO4                    | enolase family member 4                                    |
|                 | 320                | -48.37              | LRP12                   | low density lipoprotein receptor-related protein 12        |
|                 | 324                | -45.71              | GOLGA4                  | golgin A4                                                  |
| bta-miR-2484    | 178                | -21.32              | RHCG                    | Bos taurus Rh family, C glycoprotein                       |
|                 | 178                | -22.48              | DDX50                   | Bos taurus DEAD (Asp-Glu-Ala-Asp) box polypeptide 50       |

|                |     |        |        |                                                                                      |
|----------------|-----|--------|--------|--------------------------------------------------------------------------------------|
|                | 180 | -25.73 | ASB15  | Bos taurus ankyrin repeat and SOCS box containing 15                                 |
|                | 180 | -23.67 | CHST2  | carbohydrate (N-acetylglucosamine-6-O) sulfotransferase 2                            |
| bta-miR-503-3p | 174 | -21.99 | HMGH4  | Bos taurus high mobility group nucleosomal binding domain 4                          |
|                | 347 | -51.32 | AFF2   | AF4/FMR2 family, member 2                                                            |
| bta-miR-592    | 174 | -27.36 | ATP5A1 | ATP synthase, H <sup>+</sup> transporting, mitochondrial F1 complex, alpha subunit 1 |
|                | 175 | -20.09 | TPP2   | tripeptidyl peptidase II                                                             |
| bta-miR-9-5p   | 178 | -26.64 | NIN    | ninein (GSK3B interacting protein)                                                   |
|                | 323 | -45.21 | DOCK7  | dedicator of cytokinesis 7                                                           |
|                | 340 | -47.12 | KANK1  | KN motif and ankyrin repeat domains 1                                                |

**Table S3. Target genes for the first 13 differentially expressed known miRNAs in testis from cattleyak (CY) versus yak (YK) are shown, using target mining software of miRanda.** MiRNAs with >300 predicted targets in genome were excluded, whereas target genes with  $\geq 174$  total score were shown.

| MiRNA            | Total score | Total energy | Gene symbol | Gene description                                                                                       |
|------------------|-------------|--------------|-------------|--------------------------------------------------------------------------------------------------------|
| bta-novel-miR-10 | 173         | -24.3        | TRIM33      | tripartite motif containing 33                                                                         |
|                  | 172         | -25.57       | SIK2        | salt-inducible kinase 2                                                                                |
|                  | 178         | -23.19       | MAP3K8      | Bos taurus mitogen-activated protein kinase kinase kinase 8                                            |
|                  | 307         | -42.9        | TTN         | titin                                                                                                  |
|                  | 317         | -43.86       | F9          | Bos taurus coagulation factor IX (F9)                                                                  |
|                  | 329         | -43.52       | CCDC176     | coiled-coil domain containing 176                                                                      |
| bta-novel-miR-11 | 172         | -20.38       | ZMYM6       | Bos taurus zinc finger, MYM-type 6                                                                     |
|                  | 173         | -25.23       | C1orf110    | chromosome 1 open reading frame 110                                                                    |
|                  | 173         | -20.07       | RTN1        | Reticulon                                                                                              |
|                  | 174         | -22.6        | PDGFRL      | Bos taurus platelet-derived growth factor receptor-like (PDGFRL)                                       |
|                  | 175         | -21.36       | C1orf101    | chromosome 1 open reading frame 101                                                                    |
|                  | 175         | -20.13       | C16H1orf227 | Bos taurus chromosome 16 open reading frame, human C1orf227                                            |
|                  | 179         | -20.58       | MOK         | MOK protein kinase                                                                                     |
|                  | 180         | -22.75       | JAKMIP1     | Bos taurus janus kinase and microtubule interacting protein 1                                          |
|                  | 322         | -41.44       | TAF1D       | Bos taurus TATA box binding protein (TBP)-associated factor, RNA polymerase I, D                       |
| bta-novel-miR-2  | 329         | -50.64       | ANKRD24     | ankyrin repeat domain 24                                                                               |
|                  | 330         | -50.15       | FLNB        | filamin B, beta                                                                                        |
|                  | 344         | -48.16       | UTRN1       | utrophin                                                                                               |
| bta-novel-miR-4  | 172         | -29.16       | SLC7A6-202  | Bos taurus solute carrier family 7 (amino acid transporter light chain, y+L system), member 6 (SLC7A6) |
| bta-novel-miR-6  | 173         | -26.07       | NXPE3       | NXPE family member 3                                                                                   |
|                  | 173         | -24.45       | PFDN4       | prefoldin subunit 4                                                                                    |
|                  | 174         | -27.59       | SLIT2       | slit homolog 2 (Drosophila)                                                                            |
|                  | 175         | -24.11       | ANO4        | Bos taurus anoctamin 4 (ANO4)                                                                          |
| bta-novel-miR-9  | 172         | -20.05       | HIF3A-201   | Bos taurus hypoxia inducible factor 3, alpha subunit                                                   |
|                  | 173         | -23.59       | DGKE        | diacylglycerol kinase, epsilon                                                                         |
|                  | 174         | -20.88       | CD46        | CD46 molecule, complement regulatory protein                                                           |
|                  | 175         | -20.75       | LRR63       | leucine rich repeat containing 63                                                                      |
|                  | 177         | -21.97       | PHKA2       | phosphorylase kinase, alpha 2                                                                          |
|                  | 178         | -23.1        | DPY19L2     | dpy-19-like 2 (C. elegans)                                                                             |
|                  | 179         | -27.72       | CCNG2       | cyclin G2                                                                                              |

**Table S4. Target genes for the 6 differentially expressed novel miRNAs in testis from cattleyak (CY) versus yak (YK) are shown, using target mining software of miRanda. MiRNAs with > 300 predicted targets in genome were excluded, whereas target genes with  $\geq 172$  total score were shown.**

| MiRNA ID         | Stem-loop RT primer (5'-3')                       | MiRNA specific forward primer (5'-3') | Universal reverse primer (5'-3') |
|------------------|---------------------------------------------------|---------------------------------------|----------------------------------|
| bta-miR-449a     | gtgatccagtcggfccgaggtcagattccgactggatcacACCAGCTA  | gcgcgTGGCAGTGATTGTT                   | gtcgggccgaggtcag                 |
| bta-miR-449b     | gtgatccagtcggfccgaggtcagattccgactggatcacGCCAGCTA  | gcgcgAGGCAGTGATTGTT                   | gtcgggccgaggtcag                 |
| bta-miR-19b      | gtgatccagtcggfccgaggtcagattccgactggatcacTCAGTTTTG | gcgcTGTGCAAATCCATGC                   | gtcgggccgaggtcag                 |
| bta-miR-184      | gtgatccagtcggfccgaggtcagattccgactggatcacACCCTTATC | gcgTGGACGGAGAACTGA                    | gtcgggccgaggtcag                 |
| bta-miR-378      | gtgatccagtcggfccgaggtcagattccgactggatcacGCCTTCTG  | gcgACTGGACTTGGAGTC                    | gtcgggccgaggtcag                 |
| bta-miR-135      | gtgatccagtcggfccgaggtcagattccgactggatcacTCACATAGG | gcgcgcTATGGCTTTTTATTCC                | gtcgggccgaggtcag                 |
| bta-novel-miR-10 | gtgatccagtcggfccgaggtcagattccgactggatcacTCCACTCT  | gcgcgcTGATTGGTACTTCTT                 | gtcgggccgaggtcag                 |
| bta-novel-miR-11 | gtgatccagtcggfccgaggtcagattccgactggatcacGATTATAC  | gcgcgTTCTCTTCAGATCGT                  | gtcgggccgaggtcag                 |

**Table S9. Stem-loop RT-PCR primers for real-time quantification of selected differentially expressed miRNAs in testis between cattleyak and yak.**

| Gene symbol    | Forward primer (5'-3') | Reverse primer (5'-3') | PCR product (bp) |
|----------------|------------------------|------------------------|------------------|
| E2F5           | acctatccacgtgctgctta   | gctcgttcagagacaggtg    | 178              |
| CCNT2          | tgatgaaggcagtggaaga    | gtattccgtcagcactgtg    | 171              |
| NCOR2          | gaccgaaagctgacatccac   | ggattcctcgggtatggag    | 181              |
| MAPK1IP1L      | ttctgagctccaagacca     | tggccctggagatggatag    | 152              |
| ZNF226         | ccttcagtcaccagagag     | tgaagactgaagccgact     | 174              |
| MAP3K8         | cctcagtcagatacgggacc   | tgtaggtcagctccaaggg    | 189              |
| JAKMIP1        | tcagatcgagtccagcagg    | tccttggtctctcctctg     | 150              |
| $\beta$ -actin | aagttctacagtgaggcca    | gactggcccccttctccttag  | 150              |
| RPS18          | cgccgcatgtctctagtaa    | aggtcgatgtctgcttctct   | 162              |

**Table S10. Primer sequences for real-time quantification of the target genes of selected differentially expressed miRNAs.**
